# Supplementary material for: More Specific Signal Detection in Functional Magnetic Resonance Imaging by False Discovery Rate Control for Hierarchically Structured Systems of Hypotheses
Source: PubMed Central journal article supplement (PMC4767609; doi:10.1371/journal.pone.0149016), 2016-02-25
Supplement: pone.0149016.s001.pdf [file pone.0149016.s001.pdf]

# A Appendix

## A.1 Mathematical proofs

First we introduce the basic setup and notation.

**Model A.1.** Let  $(\Omega, \mathcal{F}, \{\mathbb{P}_\vartheta : \vartheta \in \Theta\})$  be a statistical experiment and let  $\mathcal{H} = \{H_1, \dots, H_m\}$  denote a set of null hypotheses of interest with  $\emptyset \neq H_i \subset \Theta$  for all  $i \in \{1, \dots, m\}$ . Let  $p_i, i \in \{1, \dots, m\}$ , denote the marginal  $p$ -value for testing  $H_i$  versus  $K_i : \Theta \setminus H_i$ . A (non-randomized) multiple test procedure  $\varphi_{(m)} = (\varphi_1, \dots, \varphi_m)^\top$  for testing  $\mathcal{H}_m$  is a vector of measurable mappings (individual tests) from the sample space into  $\{0, 1\}^m$ . In this, the event  $\{\varphi_i = 1\}$  means rejection of the  $i$ -th null hypothesis  $H_i$ . As convention, the index  $\ell$  will be used to index families, while  $i$  is used to index individual hypotheses.

### Relevant quantities.

**Definition A.1.** Under the assumptions of Model A.1, we let the total number of rejections, the number of erroneous rejections, the number of correct rejections, and the FDR, respectively, of  $\varphi_{(m)}$  be defined as

$$R_m(\varphi_{(m)}) = |\{i \in \{1, \dots, m\} : \varphi_i = 1\}|, \quad (\text{A.1})$$

$$V_m(\varphi_{(m)}) = |\{i \in \{1, \dots, m\} : \varphi_i = 1 \text{ and } H_i \text{ is true}\}|, \quad (\text{A.2})$$

$$S_m(\varphi_{(m)}) = |\{i \in \{1, \dots, m\} : \varphi_i = 1 \text{ and } H_i \text{ is false}\}|, \quad (\text{A.3})$$

$$\text{FDR}_\vartheta(\varphi_{(m)}) = \mathbb{E}_\vartheta \left[ \frac{V_m(\varphi_{(m)})}{R_m(\varphi_{(m)}) \vee 1} \right]. \quad (\text{A.4})$$

The multiple test  $\varphi_{(m)}$  is said to control the FDR at level  $\alpha \in (0, 1)$  if

$$\sup_{\vartheta \in \Theta} \text{FDR}_\vartheta(\varphi_{(m)}) \leq \alpha.$$

It is said to control the FDR asymptotically at level  $\alpha$  as  $m \rightarrow \infty$  if

$$\limsup_{m \rightarrow \infty} \sup_{\vartheta \in \Theta} \text{FDR}_\vartheta(\varphi_{(m)}) \leq \alpha.$$

If the  $m$  hypotheses are structured in disjoint families  $\mathcal{H}_1, \dots, \mathcal{H}_k$  with  $|\mathcal{H}_\ell| = m_\ell$  for  $1 \leq k \leq m$ , a multiple test  $\varphi_{(m_\ell)}$  is applied within each family, and we set  $\varphi_{(m)} = (\varphi_{(m_1)}, \dots, \varphi_{(m_k)})^\top$ , we define the global FDR of  $\varphi_{(m)}$  by

$$\text{gFDR}_\vartheta(\varphi_{(m)}) = \mathbb{E}_\vartheta \left[ \frac{\sum_{\ell=1}^k V_{m_\ell}(\varphi_{(m_\ell)})}{\left\{ \sum_{\ell=1}^k R_{m_\ell}(\varphi_{(m_\ell)}) \right\} \vee 1} \right].$$

In the sequel, all considered multiple test procedures are such that the quantities in (A.1) - (A.4) actually only depend on the joint distribution of the (random)  $p$ -values  $p_1, \dots, p_m$ , and one may assume that  $(\Omega, \mathcal{F}) = ([0, 1]^m, \mathcal{B}([0, 1]^m))$  without loss of generality.

**Critical value functions and rejection curves.** The critical values  $\alpha_{i:m}$  from Definition 2 may be defined in terms of a critical value function  $\rho : [0, 1] \rightarrow [0, 1]$ , where  $\rho$  is non-decreasing and continuous,  $\rho(0) = 0$  and  $\alpha_{i:m} = \rho(i/m), i \in \{1, \dots, m\}$ . For a given critical value function  $\rho$ , the function  $r$  defined by  $r(t) = \inf\{u : \rho(u) = t\}$  for  $t \in [0, 1]$  is called the rejection curve corresponding to  $\rho$ .

The AORC  $r_\alpha : [0, 1] \rightarrow [0, 1]$  is defined by

$$r_\alpha(t) = \frac{t}{t(1-\alpha) + \alpha}, \quad t \in [0, 1],$$

and the corresponding critical value function is given by  $r_\alpha^{-1}(t) = 1 - r_\alpha(1 - t)$ , see Finner et al. [2009]. The critical values induced by this critical value function are the ones given in Definition 3.

**Lemma A.1** (Sen [1999]). *Denote the empirical cumulative distribution function (ecdf) of the  $p$ -values  $p_1, \dots, p_m$  by  $\hat{F}_m$ , given by*

$$\hat{F}_m(t) = \sum_{i=1}^m \mathbb{I}_{[0,t]}(p_i).$$

*Assume that  $\alpha_{i:m} = \rho(i/m), i \in \{1, \dots, m\}$  for a critical value function  $\rho$  with corresponding rejection curve  $r$ . Then it holds*

$$p_{i:m} \leq \alpha_{i:m} \text{ if and only if } \hat{F}_m(p_{i:m}) \geq r(p_{i:m}).$$

**Additional technical assumptions.** Let  $m_{N\ell}$  denote the number and  $q_{N\ell}(m_\ell) = m_{N\ell}/m_\ell$  the proportion of true null hypotheses in family  $\ell \in \{1, \dots, k\}$ . Define  $\pi_\ell(m) = m_\ell/m$  as the proportion of hypotheses belonging to family  $\ell$ . Consider an asymptotic setting such that  $\forall \ell \in \{1, \dots, k\} : m_\ell \rightarrow \infty$ . For convenience, we assume  $\pi_\ell(m) \rightarrow \pi_\ell \in (0, 1)$  and  $q_{N\ell}(m_\ell) \rightarrow q_{N\ell} \in [0, 1]$ .

Let  $\vartheta^* = \vartheta^*(m_{N1}, \dots, m_{Nk})$  denote a parameter value such that for every family  $\mathcal{H}_\ell, 1 \leq \ell \leq k$ , the  $m_{N\ell}$   $p$ -values corresponding to true null hypotheses are uniformly distributed on  $[0, 1]$  and jointly stochastically independent, and that the remaining  $(m_\ell - m_{N\ell})$   $p$ -values corresponding to false null hypotheses are almost surely equal to zero. Such a parameter value is commonly referred to as a Dirac-uniform configuration, see, e. g., Section 2.2.2 of Dickhaus [2014] and references therein. Notice that  $\vartheta^*$  does not necessarily have to be contained in  $\Theta$ . Under  $\vartheta^*$ , the ecdf of the  $m_\ell$   $p$ -values in family  $\mathcal{H}_\ell$ , say  $\hat{F}_{m_\ell, \ell}$ , converges in the Glivenko-Cantelli sense to  $\hat{F}_{\infty, \ell}$ , given by  $\hat{F}_{\infty, \ell}(t) = (1 - q_{N\ell}) + q_{N\ell}t, t \in [0, 1]$ . Furthermore,  $r_\alpha$  and  $\hat{F}_{\infty, \ell}$  possess a unique point of intersection on  $[0, 1]$ , cf. Figure 5.2 of Dickhaus [2014]. We denote by  $t_{q_{N\ell}}$  the abscissa of this point of intersection. In general  $t = \alpha_{i:m}$  is called a crossing point between  $\hat{F}_m$  and  $r$  if it satisfies  $\hat{F}_m(p_{i:m}) \geq r(p_{i:m})$  and  $\hat{F}_m(p_{i+1:m}) < r(p_{i+1:m})$  for  $i \in \{1, \dots, m-1\}$  or  $\hat{F}_m(p_{m:m}) \geq r(p_{m:m})$  for  $i = m$ .

Finally, we introduce the following assumption regarding the type I error behavior of  $\varphi^{HO}$  with respect to the parameter  $\vartheta$  of the statistical model.

**Assumption A.1.** *For given numbers  $m_{N1}, \dots, m_{Nk}$ , the parameter value  $\vartheta^* = \vartheta^*(m_{N1}, \dots, m_{Nk})$  is a least favorable parameter configuration (LFC) for the FDR of  $\varphi_{(m_\ell)}^{HO}, 1 \leq \ell \leq k$ , at least asymptotically as  $\min_{1 \leq \ell \leq k} m_\ell \rightarrow \infty$ , where  $\varphi_{(m_\ell)}^{HO}$  denotes the proposed two-stage test applied in family  $\mathcal{H}_\ell$ . This means that  $\text{FDR}_\vartheta(\varphi_{(m_\ell)}^{HO}) \leq \text{FDR}_{\vartheta^*}(\varphi_{(m_\ell)}^{HO})$  for all  $\vartheta$  which are such that exactly  $m_{N\ell}$  null hypotheses are true in family  $\mathcal{H}_\ell, 1 \leq \ell \leq k$ .*

Assumption A.1 is a standard assumption in FDR theory; see, among others, Blanchard et al. [2014] and Bodnar and Dickhaus [2014] and references therein.

## Main results.

**Theorem A.1.** Let  $\vartheta \in \Theta$  and assume that for  $1 \leq \ell \leq k$  the multiple test  $\varphi_{(m_\ell)}$  is an SUD test based on the critical value function  $\rho \leq r_\alpha^{-1}$  (with corresponding rejection curve  $r$ ). Furthermore, let the assumptions from above be fulfilled and let  $\varphi_{(m)} = (\varphi_{(m_1)}, \dots, \varphi_{(m_k)})^\top$ . For notational convenience, let  $R_{m_\ell} = R_{m_\ell}(\varphi_{(m_\ell)})$  and  $V_{m_\ell} = V_{m_\ell}(\varphi_{(m_\ell)})$ .

If

$$\forall \ell \in \{1, \dots, k\} : \lim_{m_\ell \rightarrow \infty} \mathbb{P}_\vartheta \left( \frac{R_{m_\ell}}{m_\ell} \in (0, r_\alpha(t_{q_{N\ell}(m_\ell)})) \right) = 1,$$

then it holds that

$$\limsup_{m \rightarrow \infty} \text{gFDR}_\vartheta(\varphi_{(m)}) \leq \alpha.$$

*Proof.* The global FDR computes as

$$\text{gFDR}_\vartheta(\varphi_{(m)}) = \mathbb{E}_\vartheta \left[ \frac{\sum_{\ell=1}^k V_{m_\ell}}{\left\{ \sum_{\ell=1}^k R_{m_\ell} \right\} \vee 1} \right] = \mathbb{E}_\vartheta \left[ \frac{m^{-1} \sum_{\ell=1}^k V_{m_\ell}}{m^{-1} \left( \left\{ \sum_{\ell=1}^k R_{m_\ell} \right\} \vee 1 \right)} \right]. \quad (\text{A.5})$$

Let  $t_{m_\ell} \in [0, 1]$  denote the random crossing point between  $r$  and the ecdf of the  $p$ -values  $\hat{F}_{m_\ell, \ell}$  characterizing the rejection rule of  $\varphi_{(m)}$ . This allows for the representation  $R_{m_\ell}/m_\ell = r(t_{m_\ell}) = \hat{F}_{m_\ell, \ell}(t_{m_\ell})$  and  $V_{m_\ell} = m_{N\ell} \hat{F}_{N m_\ell, \ell}(t_{m_\ell})$ . This means that the right-hand side of (A.5) equals

$$\mathbb{E}_\vartheta \left[ \frac{\sum_{\ell=1}^k \pi_\ell(m) q_{N\ell} \hat{F}_{N m_\ell, \ell}(t_{m_\ell})}{\sum_{\ell=1}^k \pi_\ell(m) r(t_{m_\ell})} \right] = \mathbb{E}_\vartheta \left[ \frac{\sum_{\ell=1}^k \pi_\ell(m) q_{N\ell} \hat{F}_{N m_\ell, \ell}(t_{m_\ell}) r(t_{m_\ell}) / r(t_{m_\ell})}{\sum_{\ell=1}^k \pi_\ell(m) r(t_{m_\ell})} \right]. \quad (\text{A.6})$$

An argumentation analogous to the one in the proof of Theorem 4.5 in Gontscharuk [2010] allows us to find an asymptotic non random upper bound for  $q_{N\ell} \hat{F}_{N m_\ell, \ell}(t_{m_\ell}) / r(t_{m_\ell})$ . According to (5) in Definition 5, we can choose a  $\delta > 0$  and  $m_\ell$  large enough such that  $\sup_{t \in [0, 1]} |\hat{F}_{N m_\ell, \ell}(t) - F_{N\ell}(t)| \leq \delta$ . Then it holds that

$$q_{N\ell} \hat{F}_{N m_\ell, \ell}(t_{m_\ell}) / r(t_{m_\ell}) \leq q_{N\ell} t_{m_\ell} / r(t_{m_\ell}) + \mathcal{O}(\delta) \leq q_{N\ell} t_{q_{N\ell}} / r_\alpha(t_{q_{N\ell}}) + \mathcal{O}(\delta).$$

By design of the function  $r_\alpha$ , it holds that  $q_{N\ell} t_{q_{N\ell}} / r_\alpha(t_{q_{N\ell}}) = \min\{\alpha, q_{N\ell}\}$ . Thus, it holds that the right-hand side of (A.6) can for eventually all large  $m_\ell$  be bounded from above by

$$\mathbb{E}_\vartheta \left[ \frac{\sum_{\ell=1}^k \pi_\ell(m) r_\alpha(t_{m_\ell}) \min\{\alpha, q_{N\ell}\}}{\sum_{\ell=1}^k \pi_\ell(m) r_\alpha(t_{m_\ell})} \right] + \mathcal{O}(\delta).$$

Since  $\delta$  can be chosen arbitrarily small, this entails

$$\limsup_{m \rightarrow \infty} \text{gFDR}_\vartheta(\varphi_{(m)}) \leq \alpha. \quad \blacksquare$$

**Theorem A.2** (Statistical properties of the procedure  $\varphi^{HO}$ ). Assume that the assumptions from above are fulfilled. Then, the proposed procedure  $\varphi^{HO}$  defined by Algorithm 2 controls the FWER at the stage of the families at level  $\alpha$ . Furthermore, the global FDR of  $\varphi^{HO}$  and the FDR of  $\varphi^{HO}$  within each family are asymptotically bounded by  $\alpha$ .

*Proof.* Recall that the family  $\mathcal{H}_\ell$  is selected at the first stage of analysis if and only if the corresponding conjunction  $p$ -value  $p^{u_\ell/m_\ell}$  does not exceed  $\alpha/\kappa$ . Since  $\kappa > k$ , the Bonferroni inequality yields the first assertion.

In order to show asymptotic control of the global FDR, assume first that  $q_{N\ell} < 1$  for all  $1 \leq \ell \leq k$ . We notice that every hypothesis which is rejected by  $\varphi_{(m_\ell)}^{HO}$  would also be rejected by  $\varphi_{u_\ell, (m_\ell)}^{AORC}$  alone, where  $\varphi_{u_\ell, (m_\ell)}^{AORC}$  denotes the SUD test which is applied in family  $\mathcal{H}_\ell$  in the second stage of  $\varphi_{(m_\ell)}^{HO}$ ,  $1 \leq \ell \leq k$ . This follows from the fact that  $\kappa$  and hence,  $u_\ell$ , are fixed constants and the rejection rule of  $\varphi_{(m_\ell)}^{HO}$  involves the additional condition regarding  $p^{u_\ell/m_\ell}$ . Hence,  $R_{m_\ell}(\varphi_{(m_\ell)}^{HO}) \leq R_{m_\ell}(\varphi_{u_\ell, (m_\ell)}^{AORC})$ . Under  $\vartheta^*$  (cf. Assumption A.1) and by construction of  $r_\alpha$ , we have, by setting  $t_{q_{N\ell}} = 1$  for  $q_{N\ell} < \alpha$ , that  $R_{m_\ell}(\varphi_{u_\ell, (m_\ell)}^{AORC})/m_\ell \rightarrow r_\alpha(t_{q_{N\ell}})$  almost surely, cf. Corollary 5.1.(i) of Finner et al. [2009]. We conclude that  $\limsup_{m_\ell \rightarrow \infty} R_{m_\ell}(\varphi_{(m_\ell)}^{HO})/m_\ell \leq r_\alpha(t_{q_{N\ell}})$  for all  $\vartheta \in \Theta$ . On the other hand, consider for each  $1 \leq \ell \leq k$  such that  $\mathcal{H}_\ell$  has been selected at the first stage of analysis the following chain of inequalities:

$$\begin{aligned} p_{u_\ell:m_\ell} &\leq \min_{j=1, \dots, (m_\ell - u_\ell + 1)} \left\{ p_{(u_\ell - 1 + j):m_\ell} \right\} \\ &\leq p^{u_\ell/m_\ell} = \min_{j=1, \dots, (m_\ell - u_\ell + 1)} \left\{ \frac{(m_\ell - u_\ell + 1)}{j} p_{(u_\ell - 1 + j):m_\ell} \right\} \\ &\leq \frac{\alpha}{\kappa} \leq r_\alpha^{-1} \left( \frac{m_\ell/\kappa}{m_\ell} \right) \leq r_\alpha^{-1} \left( \frac{\lfloor 1/\kappa \cdot m_\ell \rfloor + 1}{m_\ell} \right) = r_\alpha^{-1} \left( \frac{u_\ell}{m_\ell} \right). \end{aligned}$$

Thus, if the family  $\mathcal{H}_\ell$  is rejected, the SUD procedure  $\varphi_{u_\ell, (m_\ell)}^{AORC}$  will reject at least  $u_\ell$  hypotheses within  $\mathcal{H}_\ell$ . Notice that, by definition of  $u_\ell$ , we have that  $u_\ell/m_\ell \geq \kappa^{-1}$ . We conclude that, in each selected family  $\mathcal{H}_\ell$ ,  $\liminf_{m_\ell \rightarrow \infty} R_{m_\ell}(\varphi_{(m_\ell)}^{HO})/m_\ell > 0$ . Thus, Theorem A.1 can be applied with  $k$  replaced by  $|\{1 \leq \ell \leq k : \mathcal{H}_\ell \text{ has been rejected}\}|$  in this case.

However, if for some  $\ell \in \{1, \dots, k\}$  we have  $q_{N\ell} = 1$ , we can find a number  $m_\ell$  which is large enough such that  $\mathbb{P}_\vartheta(p^{u_\ell/m_\ell} \leq \alpha/\kappa) \leq \alpha/\kappa$  due to the assumed validity of the conjunction  $p$ -value. Hence, letting  $x$  denote all observed data, straightforward calculation yields for  $\vartheta$ , which is such that  $q_{N\ell} = 1$ , that

$$\begin{aligned} \mathbb{E}_\vartheta \left[ \frac{V_{m_\ell}}{R_{m_\ell} \vee 1} \right] &= \int \frac{V_{m_\ell}(x)}{R_{m_\ell}(x) \vee 1} d\mathbb{P}_\vartheta(x) \\ &= \int_{\{p^{u_\ell/m_\ell} \leq \alpha/\kappa\}} \frac{V_{m_\ell}(x)}{R_{m_\ell}(x) \vee 1} d\mathbb{P}_\vartheta(x) + \int_{\{p^{u_\ell/m_\ell} > \alpha/\kappa\}} \frac{V_{m_\ell}(x)}{R_{m_\ell}(x) \vee 1} d\mathbb{P}_\vartheta(x) \\ &\leq \int_{\{p^{u_\ell/m_\ell} \leq \alpha/\kappa\}} 1 d\mathbb{P}_\vartheta + 0 \\ &= \mathbb{P}_\vartheta(p^{u_\ell/m_\ell} \leq \alpha/\kappa) \leq \alpha/\kappa, \end{aligned}$$

which completes the argumentation.

Asymptotic FDR control within each family can be established as follows. If a family  $\mathcal{H}_\ell$  is not rejected, we have  $R_{m_\ell}(\varphi_{(m_\ell)}^{HO}) = V_{m_\ell}(\varphi_{(m_\ell)}^{HO}) = 0$ . On the other hand, in each selected family  $\mathcal{H}_\ell$ , it holds  $V_{m_\ell}(\varphi_{(m_\ell)}^{HO}) \leq V_{m_\ell}(\varphi_{u_\ell, (m_\ell)}^{AORC})$  by the same argumentation as for  $R_{m_\ell}(\varphi_{(m_\ell)}^{HO})$ . Under the LFC  $\vartheta^*$ , this also entails that

$$\frac{V_{m_\ell}(\varphi_{(m_\ell)}^{HO})}{R_{m_\ell}(\varphi_{(m_\ell)}^{HO}) \vee 1} \leq \frac{V_{m_\ell}(\varphi_{u_\ell, (m_\ell)}^{AORC})}{R_{m_\ell}(\varphi_{u_\ell, (m_\ell)}^{AORC}) \vee 1}$$

almost surely, because the structure of an SUD test yields that, as soon as  $V_{m_\ell}(\varphi_{(m_\ell)}^{HO}) \geq 1$ , we have  $R_{m_\ell}(\varphi_{(m_\ell)}^{HO}) = V_{m_\ell}(\varphi_{(m_\ell)}^{HO}) + (m_\ell - m_{N_\ell})$ , and the mapping  $x \mapsto x/(x+a)$  is isotone in  $x > 0$  for  $a \geq 0$ . Since  $\varphi_{u_\ell, (m_\ell)}^{AORC}$  asymptotically controls the FDR under  $\vartheta^*$ , this implies the assertion. ■

## A.2 The tuning parameter $\kappa$

Here, we report results of a power study regarding the tuning parameter  $\kappa$ . The study was done in two setups for the normal means problem with effect size  $\mu^*$  and variance 1, analogous to the simulations in “Computer simulations regarding the power of  $\varphi^{HO}$ “. Our theoretical investigations indicate that we can expect the power of the procedure  $\varphi^{HO}$  within one selected family  $\mathcal{H}_\ell$  (in our case of size  $m_\ell = 2,000$ ) to depend on the ratio of true null hypotheses  $q_{N_\ell}$  within the family. To this end, we considered a balanced and a highly unbalanced case by setting  $q_{N_\ell} \in \{0.5, 0.99\}$ . In both cases the power of  $\varphi^{HO}$  has been estimated as a function of  $\mu^* \in [0, 5]$ , and we let the parameter  $\kappa$  range from 1 to 10,000,000 on a  $\log_{10}$  scale.

The plots in S1 Fig. indicate that small values of  $\kappa$  lead to a high specificity in case of a large value of  $q_{N_\ell}$ , while large values of  $\kappa$  lead to a good sensitivity in case of a moderate value of  $q_{N_\ell}$ . This is line with the recommendation that  $\kappa$  should be chosen according to the amount of signals within a family which is considered relevant.

## References

- Blanchard, G., Dickhaus, T., Roquain, E., Villers, F., 2014. On least favorable configurations for step-up-down tests. *Stat. Sin.* 24 (1), 1–23.
- Bodnar, T., Dickhaus, T., 2014. False discovery rate control under Archimedean copula. *Electron. J. Stat.* 8 (2), 2207–2241.
- Dickhaus, T., 2014. Simultaneous statistical inference. With applications in the life sciences. Berlin: Springer.
- Finner, H., Dickhaus, T., Roters, M., 2009. On the false discovery rate and an asymptotically optimal rejection curve. *Ann. Stat.* 37 (2), 596–618.
- Gontscharuk, V., 2010. Asymptotic and Exact Results on FWER and FDR in Multiple Hypotheses Testing. Ph.D. thesis, Heinrich-Heine-Universität Düsseldorf.
- Sen, P., 1999. Some remarks on simes-type multiple test of significance. *J. Stat. Plan. Inference* 82, 139–145.
